# Supplementary material
Source: publisher site journal article supplement (https://static.cambridge.org/content/id/urn:cambridge.org:id:article:S0002731618000173/resource/name/Supplemental_Text_5.docx)
Supplement: Supplementary file 1 [file Supplemental_Text_5.docx]

Supplemental Figure 1. Metini Village (CA-SON-175) glass beads with Kidd and Kidd (2012[1970]) bead type designations. (a) Red-on-white, post ca. 1841 (cornaline d’Aleppo, Kidd and Kidd Iva2); (b) Red-on-green, pre ca. 1844 (green heart, Kidd and Kidd IVa6) (c) Drawn compound, white-on-white (Kidd and Kidd IVa13) (d) Bohemian cut, clear-over-white, post ca. 1840 (Kidd and Kidd IIIf1) (e) Wound simple white oblate (Kidd and Kidd WIb2) (f) Bohemian cut, “Russian”/cobalt blue, post ca. 1840 (Kidd and Kidd If3) (g) Bohemian cut, light green, ca. 1840s and later (Kidd and Kidd IVa13).
